# Supplementary material
Source: Springer Nature journal article supplement (https://www.springermedizin.de/resource/supplementary/12987_2005_76_MOESM1_ESM.pdf/9611264)

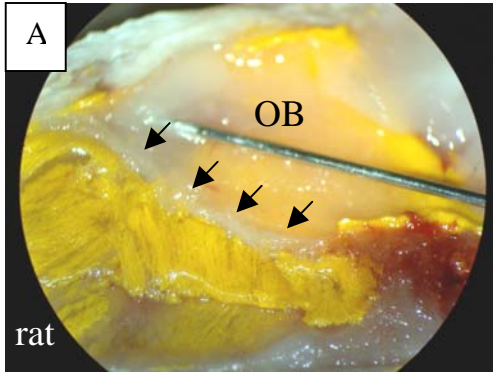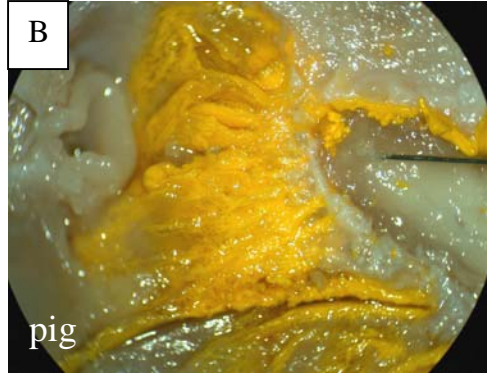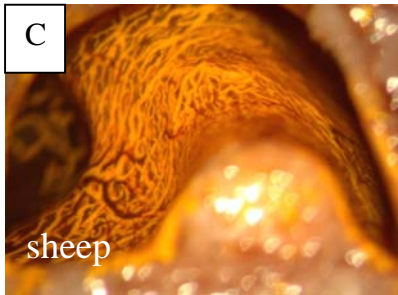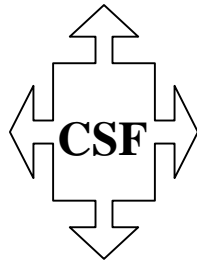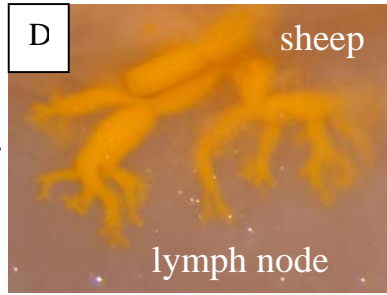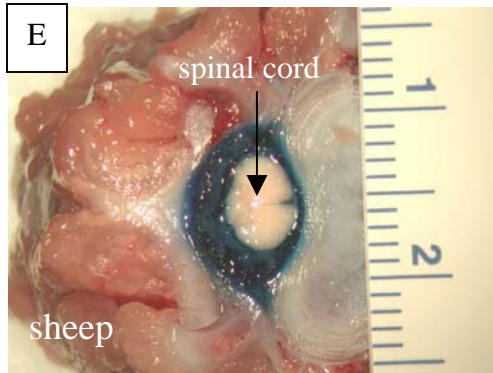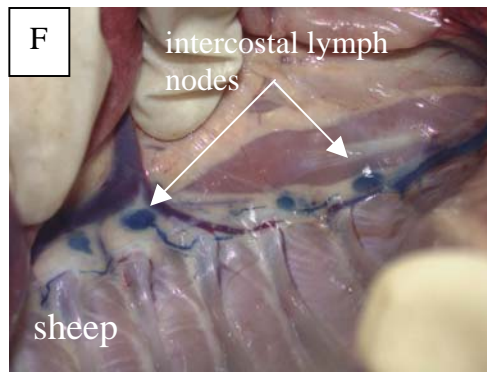

Supplement: MOESM1 [file 9611264]
